# Supplementary material for: A first-principles study on the electronic, piezoelectric, and optical properties and strain-dependent carrier mobility of Janus TiXY (X ≠ Y, X/Y = Cl, Br, I) monolayers
Source: Royal Society of Chemistry journal article supplement (doi:10.1039/d2cp03973g), 2022-11-10
Supplement: d2cp03973g2.pdf [file d2cp03973g2.pdf]

## Supplemental Material for

# First-principles study of electronic, piezoelectric, optical, and strain-dependent carrier mobility of Janus $\text{TiXY}$ ( $X \neq Y$ , $X/Y = \text{Cl, Br, I}$ ) monolayers†

Qiu Yang<sup>1</sup>, Tian Zhang<sup>2</sup>, Cui-E Hu<sup>3,\*</sup>, Xiang-Rong Chen<sup>1,\*</sup>, Hua-Yun Geng<sup>4</sup>

<sup>1</sup> Institute of Atomic and Molecular Physics, Sichuan University, Chengdu 610065, China;

<sup>2</sup> College of Physics and Electronic Engineering, Sichuan Normal University, Chengdu 610066, China;

<sup>3</sup> College of Physics and Electronic Engineering, Chongqing Normal University, Chongqing 400047, China;

<sup>4</sup> National Key Laboratory for Shock Wave and Detonation Physics Research, Institute of Fluid Physics, CAEP, Mianyang 621900, China

### Abstract:

Janus transition metal dichalcogenide monolayers (TMDs) have attracted wide attention due to their unique physical and chemical properties since the successful synthesis of the MoSSe monolayer. However, the related studies of the Janus monolayers of the transition metal halide (TMHs) type with similar structure are rarely reported. In this paper, we systematically investigated the electronic properties, piezoelectric properties, optical properties, and carrier mobility of the new Janus  $\text{TiXY}$  ( $X \neq Y$ ,  $X/Y = \text{Cl, Br, I}$ ) from first principles for the first time. The Janus  $\text{TiXY}$

\* Corresponding authors. E-mail: [cuiehu@cqnu.edu.cn](mailto:cuiehu@cqnu.edu.cn); [xrchen@scu.edu.cn](mailto:xrchen@scu.edu.cn)

monolayers are thermally, dynamically, and mechanically stable, and their energy bands near the Fermi level ( $E_F$ ) are almost entirely contributed by the central Ti atom. Besides, the Janus TiXY monolayers exhibit excellent in-plane and out-of-plane piezoelectric effects, especially for the in-plane piezoelectric coefficient  $\sim 4.58$  pm/V of the TiBrI monolayer and the out-of-plane piezoelectric coefficient  $\sim 1.63$  pm/V of the TiClI monolayer, suggesting their promising applications in the piezoelectric sensors and energy storage. The absorption spectra of the Janus TiXY monolayers are mainly distributed in the visible and infrared regions, implying that they are fantastic candidates in the photoelectric and photovoltaic fields. The calculated results of the carrier mobility revealed that the TiXY monolayers are hole-type semiconductors. Under the regulation of the uniaxial compressive strain, the hole mobilities of these monolayers are gradually improved, indicating that the TiXY monolayers have potential applications in the field of flexible electronic devices.

**Keywords:** TiXY monolayers; First-principles calculations; Electronic property; Piezoelectric property; Optical property; Carrier mobility

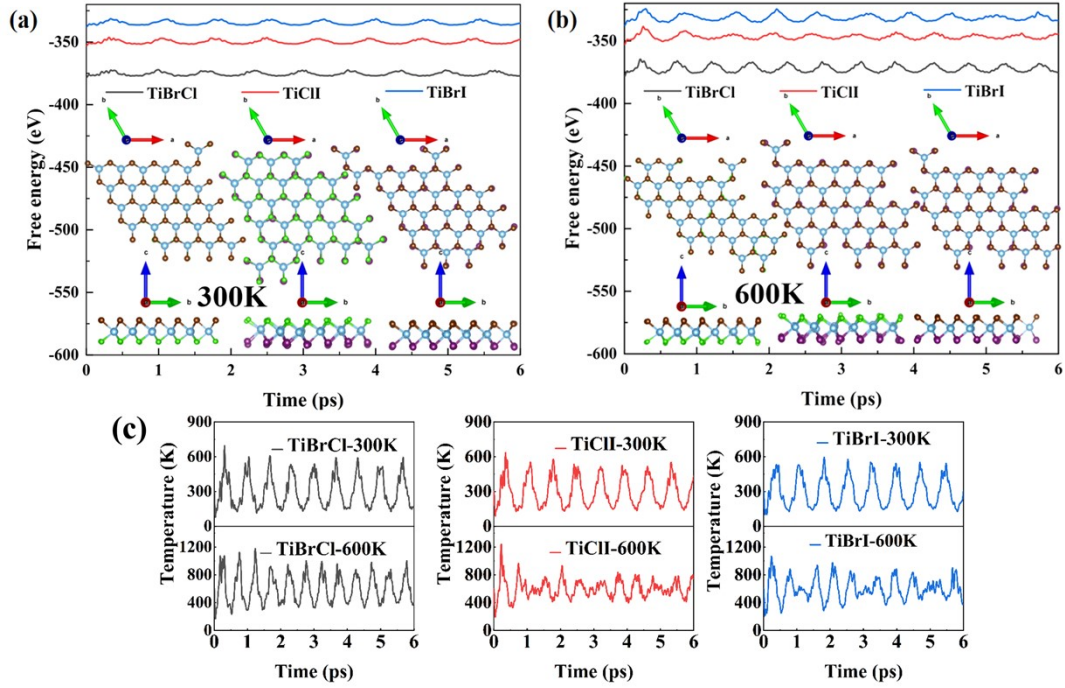

**Fig. S1** (Color online) (a) Free energy fluctuations with respect to time and equilibrium structures for Janus  $\text{TiXY}$  ( $X \neq Y$ ,  $X/Y = \text{Cl, Br, I}$ ) monolayers in AIMD simulations at 300 K; (b) Free energy fluctuations with respect to time and equilibrium structures for Janus  $\text{TiXY}$  ( $X \neq Y$ ,  $X/Y = \text{Cl, Br, I}$ ) monolayers in AIMD simulations at 600 K; (c) Fluctuation of temperature with time for Janus  $\text{TiXY}$  ( $X \neq Y$ ,  $X/Y = \text{Cl, Br, I}$ ) monolayers at 300K and 600K cases.

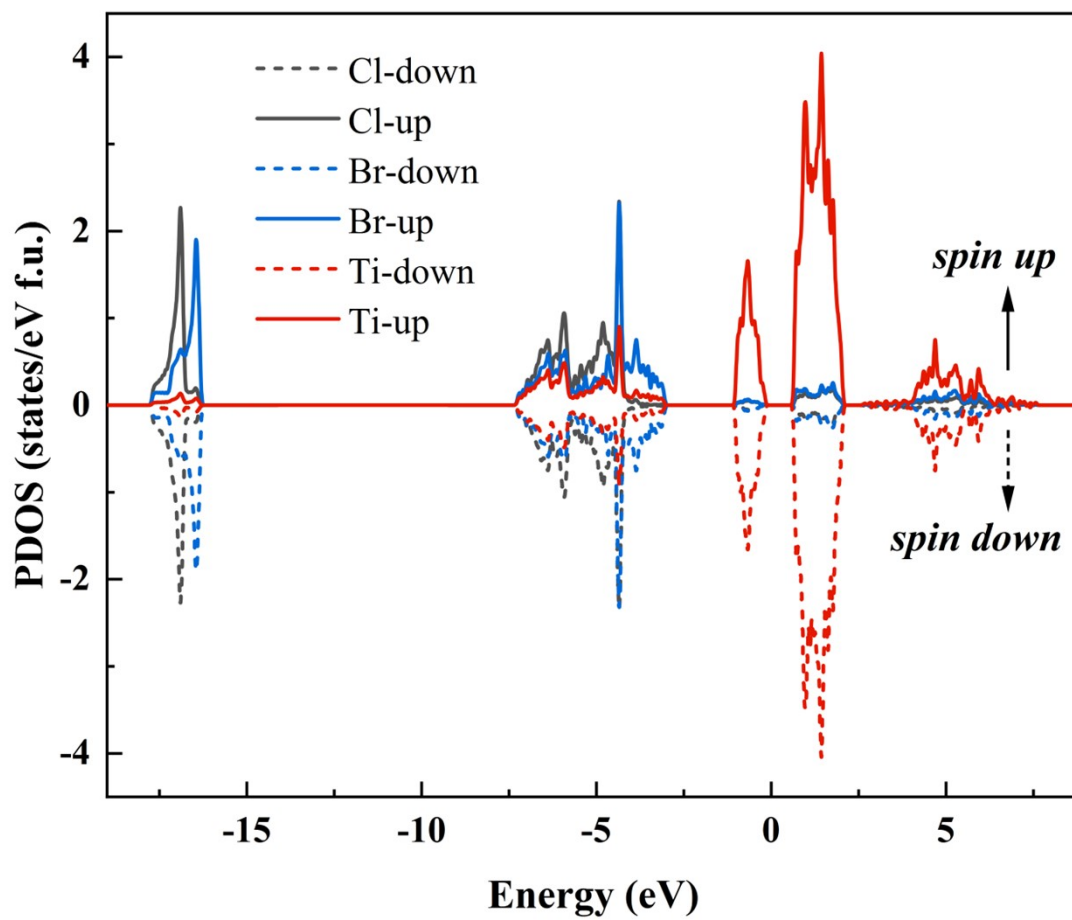

**Fig. S2** (Color online) The density of states (DOS) considering spin polarization of the TiBrCl monolayer.

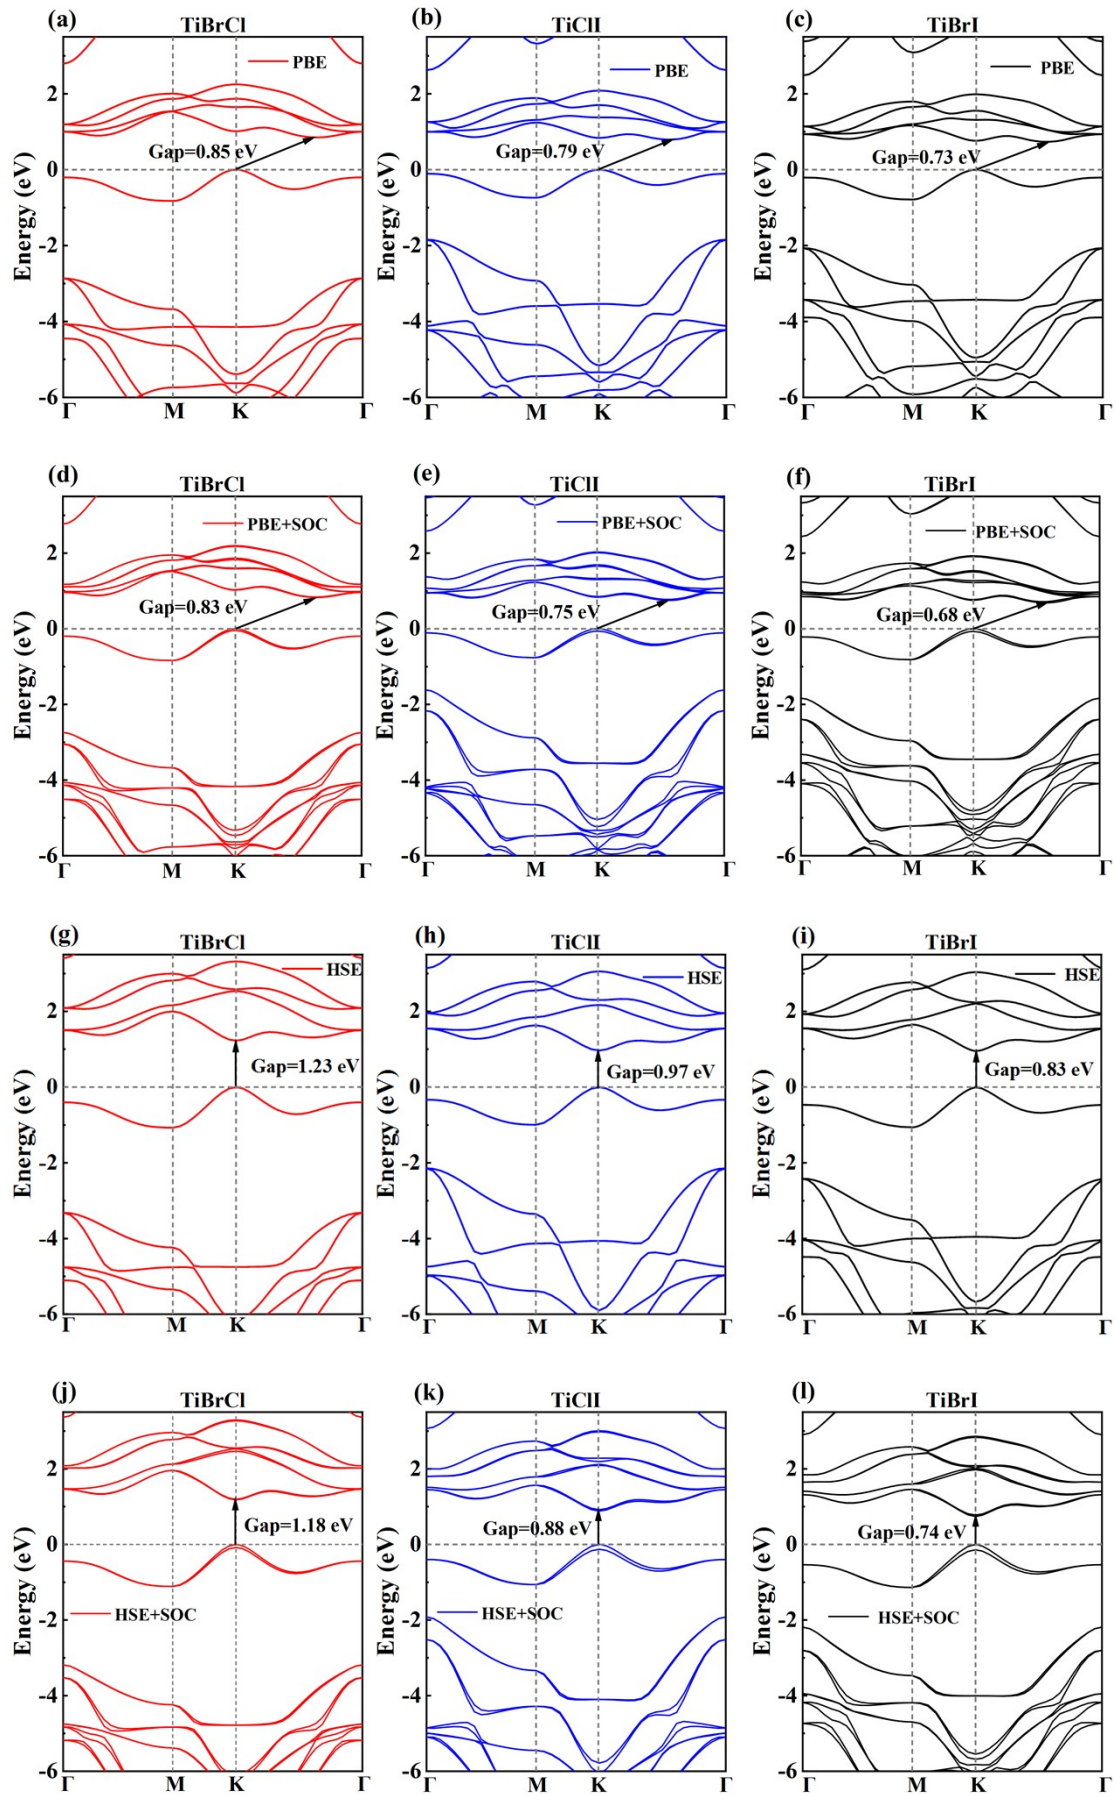

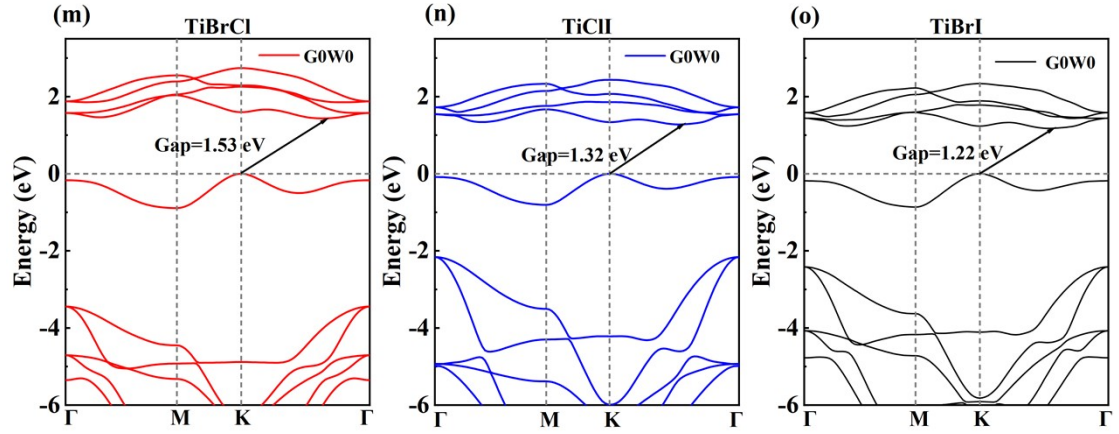

**Fig. S3** (Color online) The electronic band structures of the Janus  $\text{TiXY}$  ( $X \neq Y$ ,  $X/Y = \text{Cl, Br, I}$ ) monolayers. (a), (b), and (c) are the bands calculated by using the PBE method. (d), (e), and (f) are the bands calculated by using the PBE+SOC method. (g), (h), and (i) are the bands computed by using the HSE06 method. (j), (k), and (l) are the bands calculated by using the HSE06+SOC method. (m), (n), and (o) are the bands calculated by using the  $G_0W_0$  method.

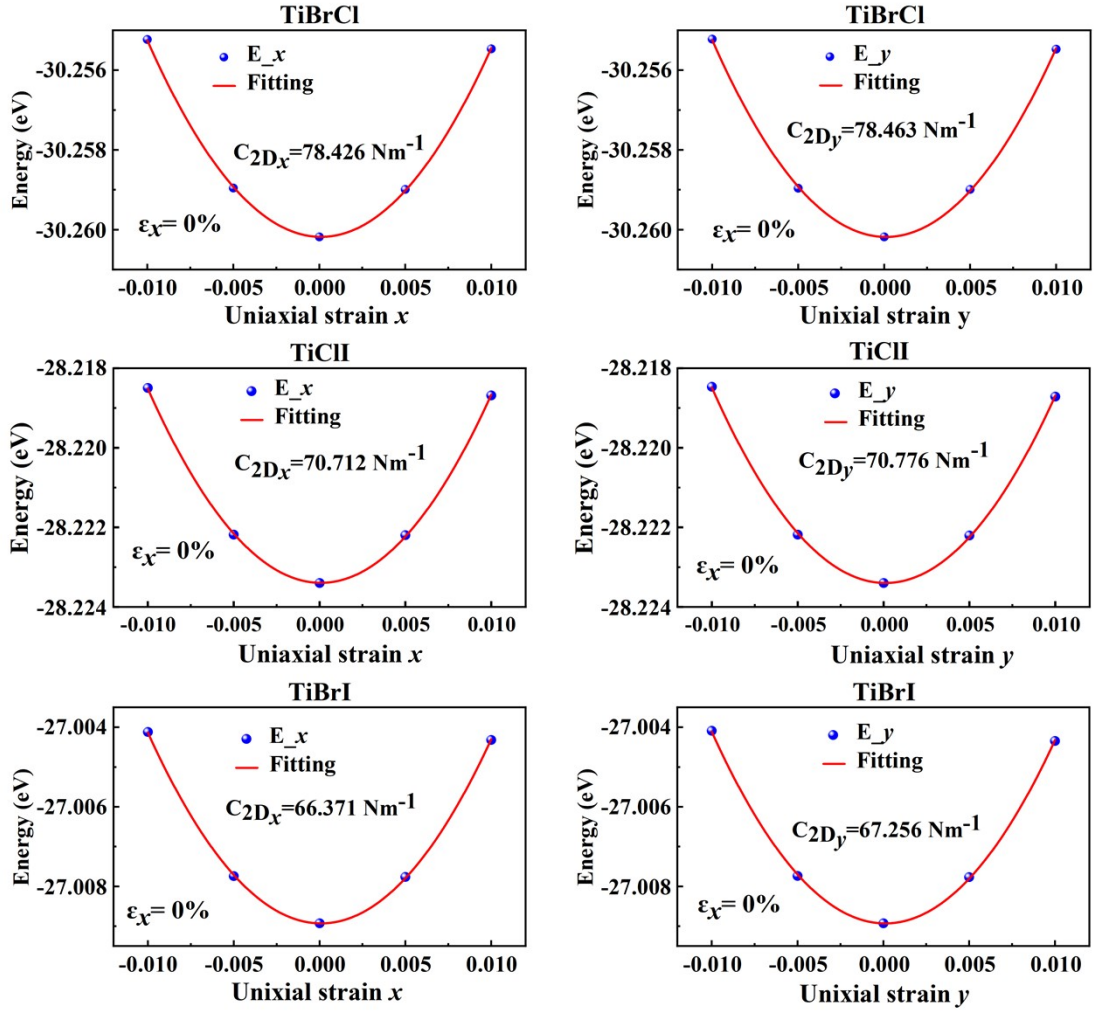

**Fig. S4** (Color online) The elastic modulus  $C_{2D}$  along the propagation direction is obtained through the quadratic function fitting the total energy of the TiXY monolayers under small uniaxial strain.

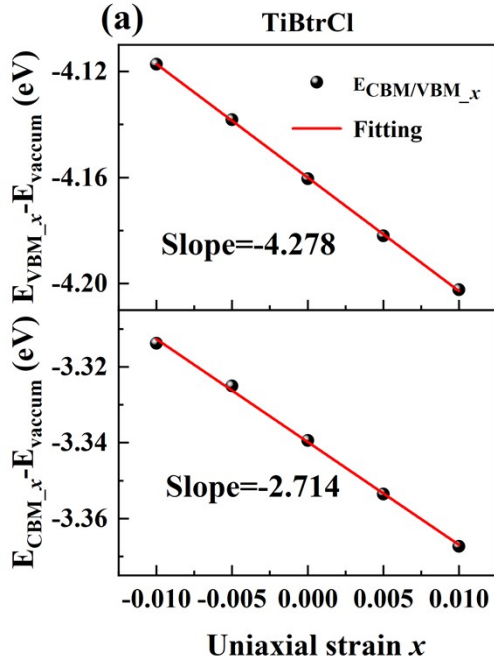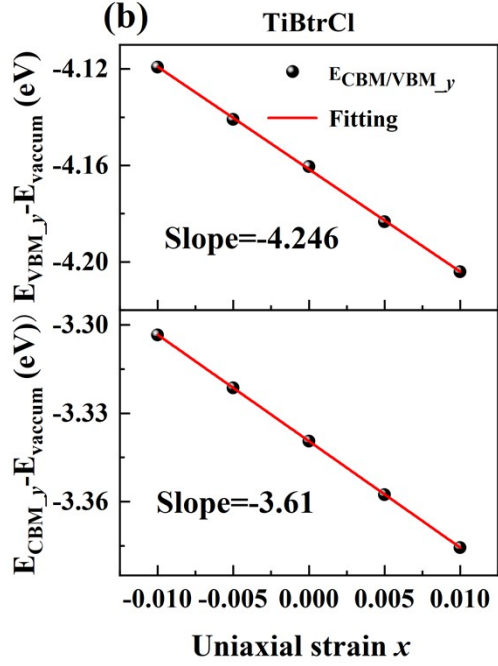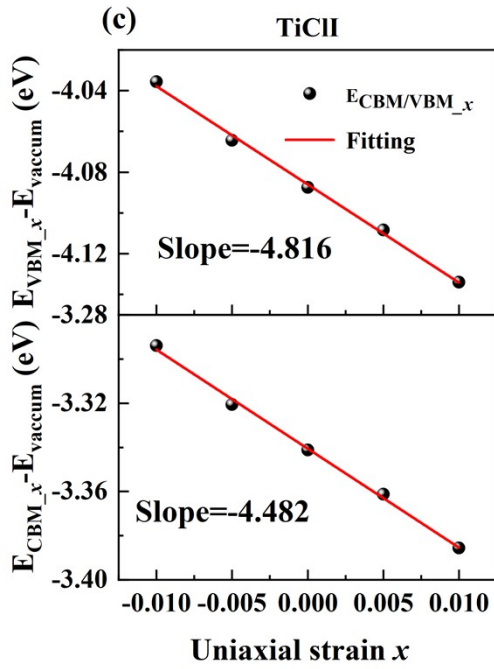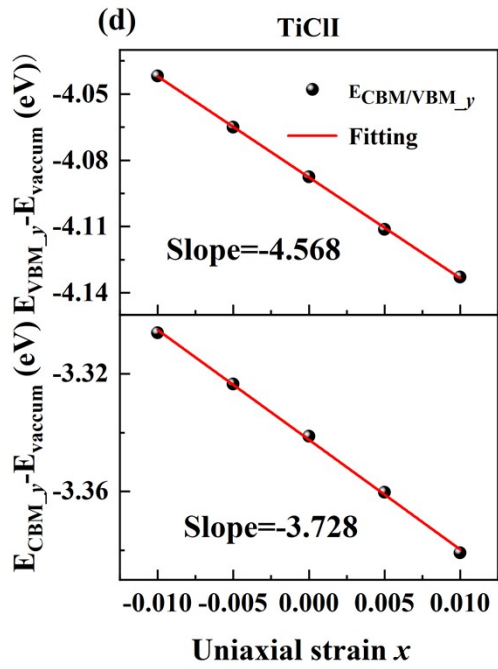



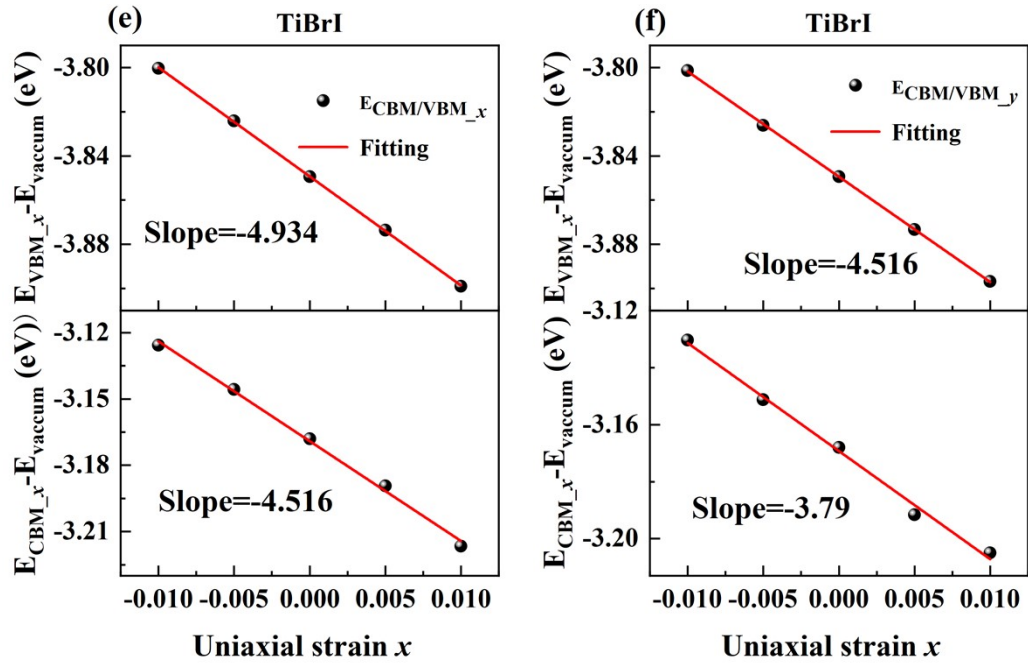

**Fig. S5** (Color online) The deformation potential constant  $E_1$  along the propagation direction is obtained by linear fitting the band energies of the VBMs and CBMs with respect to the vacuum energy for the TiXY monolayers.

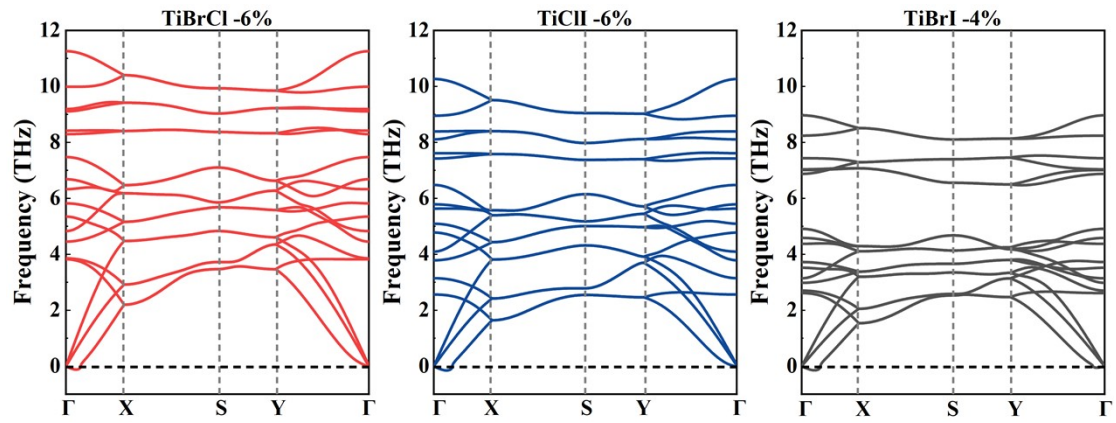

**Fig. S6** (Color online) Orthogonal cellular phonon dispersion curves of the compressed structures for the Janus  $\text{TiXY}$  monolayers: (a) -6% uniaxial strain along  $x$  direction for  $\text{TiBrCl}$ ; (b) -6% uniaxial strain along  $x$  direction for  $\text{TiClI}$ ; (c) -4% uniaxial strain along  $x$  direction for  $\text{TiBrI}$ .

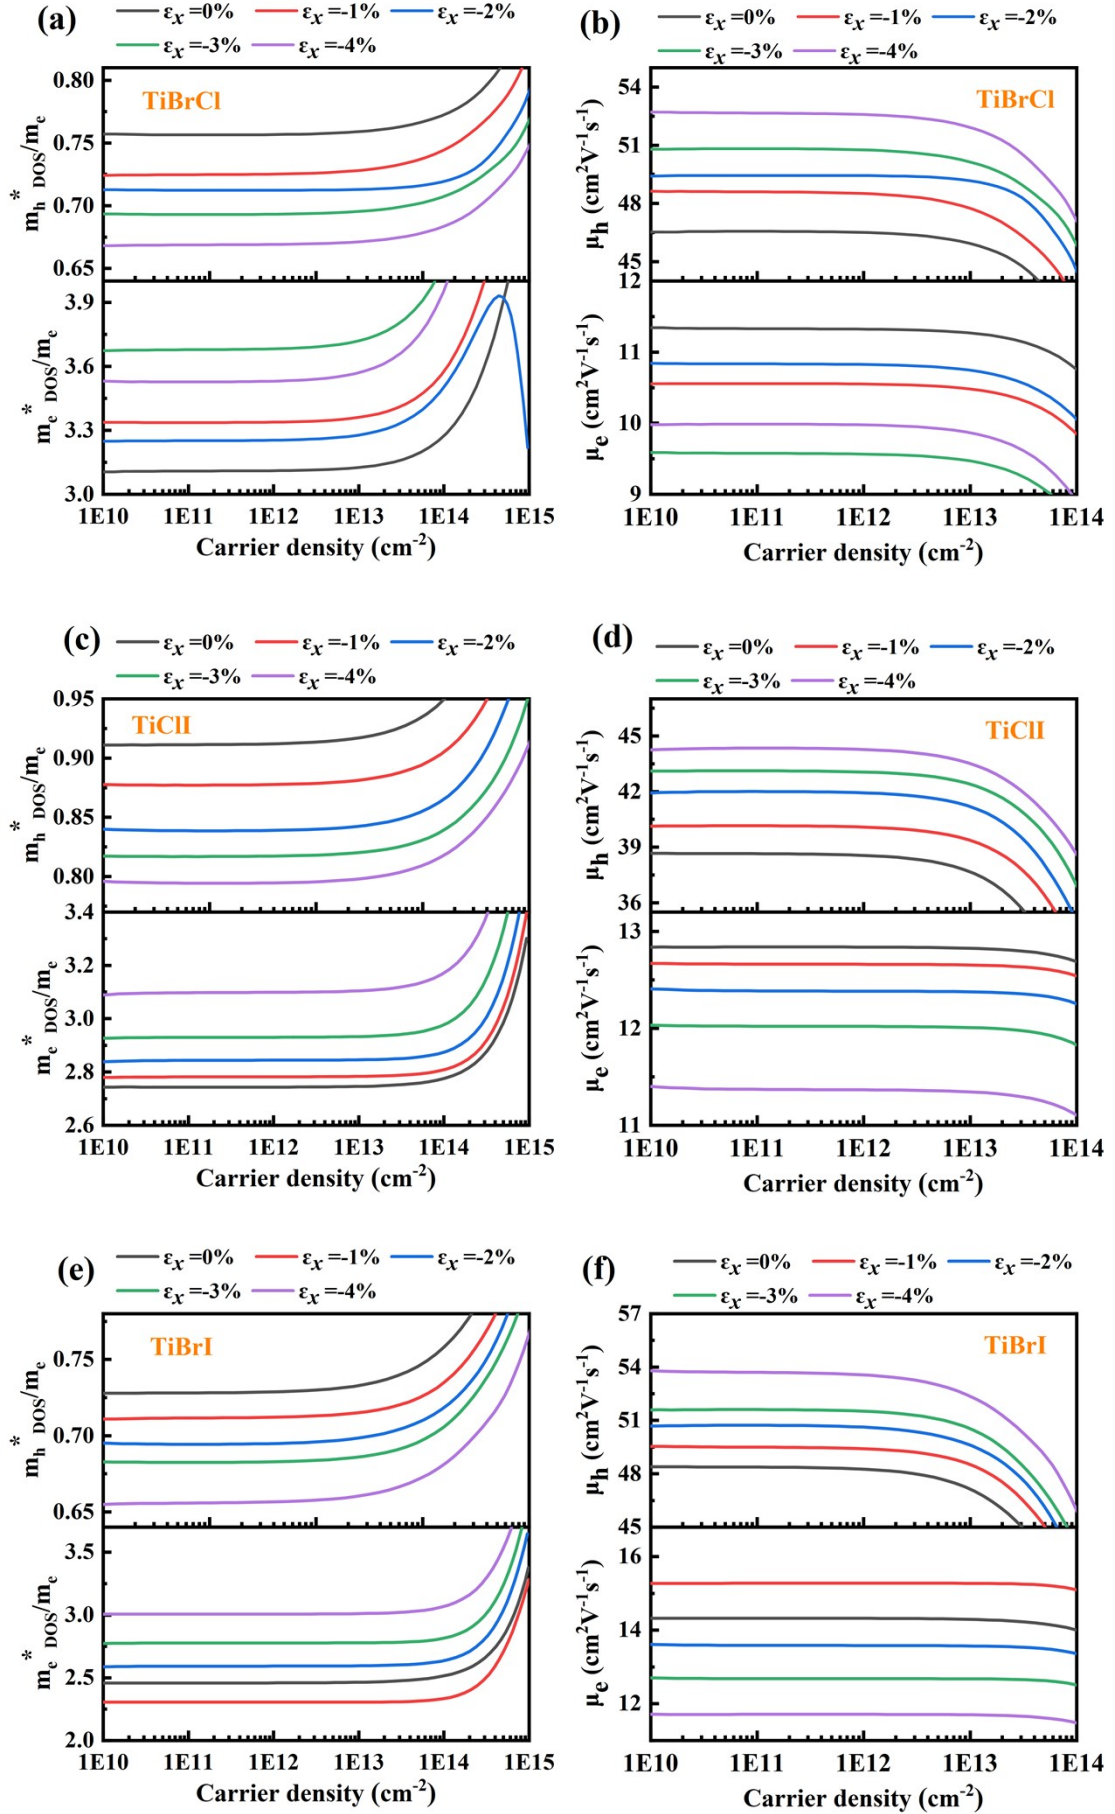

**Fig. S7** (Color online) The density-of-states-averaged electron and hole-effective mass  $m_{e,h}^*$  (DOS) and mobility  $\mu_{e,h}$  obtained with the Boltzmann transport theory as a function of the carrier density for monolayer TiBrCl (a), (b); monolayer TiClI (c), (d); and monolayer TiBrI monolayer (e), (f) under different compressive strains ( $\varepsilon_x = 0\%, -1\%, -2\%, -3\%, -4\%$ ). A 10 fs scattering time ( $\tau$ ) was assumed at a constant temperature of 300 K.

**Table S1** DOS-averaged effective masses, electrons and mobilities under different uniaxial strains for the Janus TiXY monolayers. These data were calculated at a carrier density of  $10^{14}$  cm<sup>-2</sup> and the assumption of  $\tau=10$  fs.

| Materials | Strains | $m_{eDOS}^*$ ( $m_e$ ) | $m_{eDOS}^*$ ( $m_e$ ) | $\mu_{eDOS}^*$ (cm <sup>2</sup> V <sup>-1</sup> s <sup>-1</sup> ) | $\mu_{hDOS}^*$ (cm <sup>2</sup> V <sup>-1</sup> s <sup>-1</sup> ) |
|-----------|---------|------------------------|------------------------|-------------------------------------------------------------------|-------------------------------------------------------------------|
| TiBrCl    | 0%      | 3.106                  | 0.757                  | 11.342                                                            | 46.523                                                            |
|           | -1%     | 3.337                  | 0.724                  | 10.842                                                            | 48.632                                                            |
|           | -2%     | 3.248                  | 0.713                  | 10.554                                                            | 49.421                                                            |
|           | -3%     | 3.676                  | 0.694                  | 9.975                                                             | 50.785                                                            |
|           | -4%     | 3.528                  | 0.668                  | 9.587                                                             | 52.714                                                            |
| TiClI     | 0%      | 2.744                  | 0.911                  | 12.838                                                            | 38.665                                                            |
|           | -1%     | 2.781                  | 0.877                  | 12.674                                                            | 40.127                                                            |
|           | -2%     | 2.843                  | 0.840                  | 12.405                                                            | 41.955                                                            |
|           | -3%     | 2.929                  | 0.817                  | 12.032                                                            | 43.117                                                            |
|           | -4%     | 3.097                  | 0.796                  | 11.398                                                            | 44.295                                                            |
| TiBrI     | 0%      | 2.459                  | 0.728                  | 14.325                                                            | 48.389                                                            |
|           | -1%     | 2.307                  | 0.711                  | 15.264                                                            | 49.551                                                            |
|           | -2%     | 2.588                  | 0.695                  | 13.614                                                            | 50.695                                                            |
|           | -3%     | 2.773                  | 0.683                  | 12.702                                                            | 51.592                                                            |
|           | -4%     | 3.008                  | 0.655                  | 11.711                                                            | 53.784                                                            |
